# Supplementary material for: Spinning fabrication of graphene/polypyrrole composite fibers for all-solid-state, flexible fibriform supercapacitors
Source: Royal Society of Chemistry journal article supplement (doi:10.1039/c4ta01230e), 2014-06-06
Supplement: c4ta01230e1.pdf [file c4ta01230e1.pdf]

## Supplementary Information

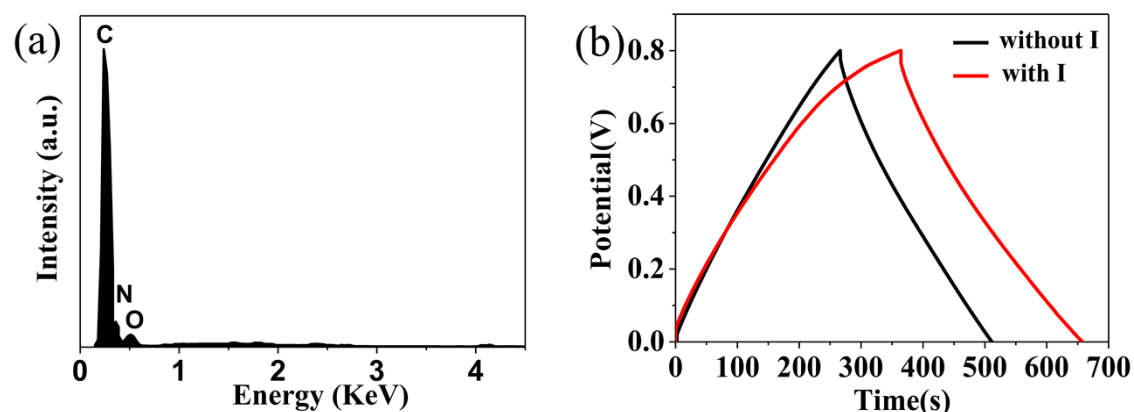

**Fig. S1** (a) Energy-dispersive spectrometry (EDS) spectrum of the *iodine-free* G/PPy fiber. (b) Charge-discharge curves of the fibers with (red) and without (black) I at a current density of 0.24 mA/cm<sup>2</sup> in the two electrode system with the H<sub>2</sub>SO<sub>4</sub>-PVA gel polyelectrolyte.

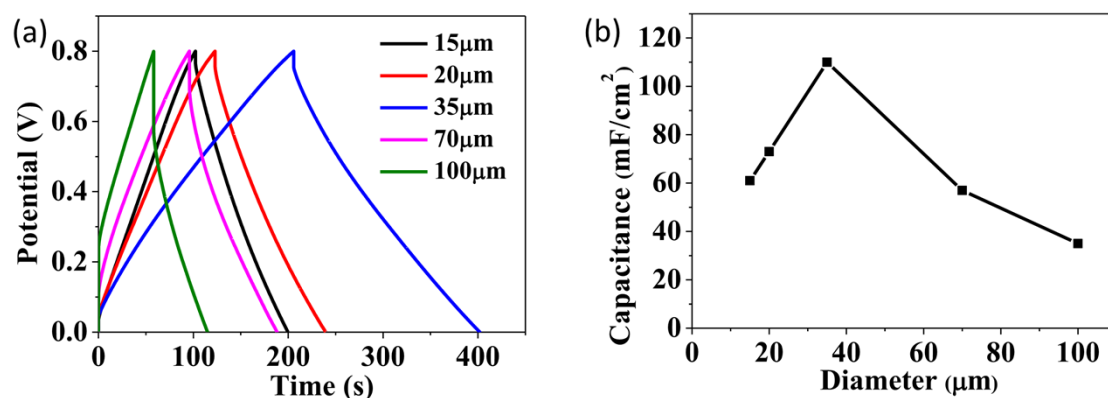

**Fig. S2** (a) The charge-discharge curves of the G/PPy fibers with different diameters of 15 to 100 μm at a current density of 0.5 mA/cm<sup>2</sup> in the two-electrode system with the H<sub>2</sub>SO<sub>4</sub>-PVA gel polyelectrolyte, respectively. (b) The corresponding capacitances of the G/PPy fibers with different diameters of 15 to 100 μm, respectively.

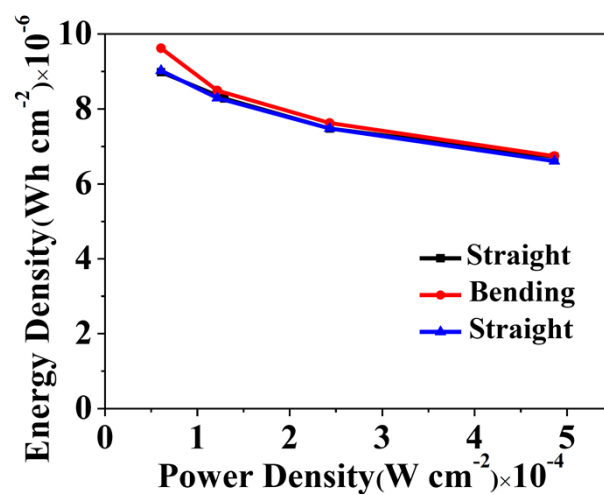

**Fig. S3** Ragone plot of the supercapacitor based on G/PPy fibers of 35  $\mu\text{m}$  in diameter in straight and bending states.

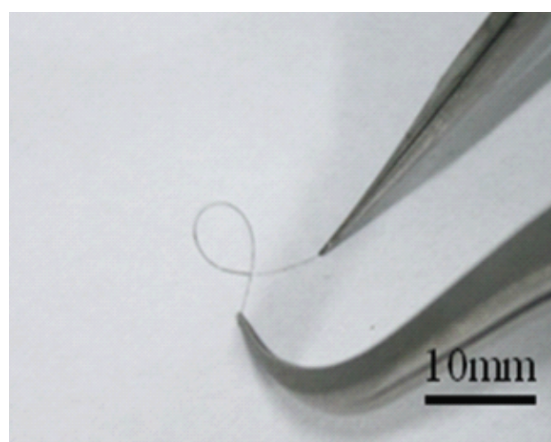

**Fig S4.** The photo of a distorted G/PPy fiber supercapacitor.
